# Supplementary material for: Single iron atoms stabilized by microporous defects of biomass-derived carbon aerogels as high-performance cathode electrocatalysts for aluminum–air batteries
Source: Royal Society of Chemistry journal article supplement (doi:10.1039/c9ta05981d), 2019-01-01
Supplement: c9ta05981d1.pdf [file c9ta05981d1.pdf]

Electronic Supplementary Information

## **Single iron atoms stabilized by microporous defects of biomass-derived carbon aerogels as high-performance cathode electrocatalysts for Al-air batteries**

Ting He,<sup>a,b</sup> Yaqian Zhang,<sup>c</sup> Yang Chen,<sup>a</sup> Zhenzhu Zhang,<sup>a</sup> Haiyan Wang,<sup>a</sup> Yongfeng Hu,<sup>d</sup> Min Liu,<sup>e</sup> Chih-Wen Pao,<sup>f</sup> Jeng-Lung Chen,<sup>f</sup> Lo Yueh Chang,<sup>g,h</sup> Zhifang Sun,<sup>a,\*</sup> Juan Xiang,<sup>a</sup> Yi Zhang<sup>a,\*</sup> and Shaowei Chen<sup>b,\*</sup>

<sup>a</sup> Hunan Provincial Key Laboratory of Efficient and Clean Utilization of Manganese Resources, School of Chemistry and Chemical Engineering, Central South University, Changsha 410083 (China),  
allensune@gmail.com; yzhangcsu@csu.edu.cn

<sup>b</sup> Department of Chemistry and Biochemistry, University of California, 1156 High Street, Santa Cruz, California 95064 (United States), shaowei@ucsc.edu

<sup>c</sup> Department of Chemical and Materials Engineering, University of Alberta, Edmonton, Alberta T6G 1H9 (Canada)

<sup>d</sup> Canadian Light Source, Saskatoon, Saskatchewan (Canada)

<sup>e</sup> Institute of Super-Microstructure and Ultrafast Process in Advanced Materials, School of Physics and Electronics, Central South University, Changsha 410083 (China)

<sup>f</sup> X-ray Absorption Group, National Synchrotron Radiation Research Center, Hsinchu 30076 (Taiwan, Republic of China)

<sup>g</sup> Institute of Functional Nano & Soft Materials (FUNSOM), Soochow University, Suzhou, Jiangsu 215123 (China)

<sup>h</sup> Soochow University- Western University Centre for Synchrotron Radiation Research, Suzhou, Jiangsu 215123 (China)

**Table S1** Elemental contents of the various catalysts determined by XPS.

| elements | CA <sub>LR</sub><br>at % | NCA <sub>LR</sub><br>at % | CA <sub>LR</sub> /Fe<br>at % | NCA <sub>LR</sub> /Fe<br>at % |
|----------|--------------------------|---------------------------|------------------------------|-------------------------------|
| C        | 97.85                    | 94.43                     | 95.49                        | 94.86                         |
| O        | 2.09                     | 2.30                      | 2.18                         | 2.07                          |
| N        | 0.06                     | 3.27                      | 2.21                         | 2.74                          |
| Fe       | 0                        | 0                         | 0.12                         | 0.34                          |

**Table S2** EDS data for the NCA<sub>LR</sub>/Fe catalyst

| elements | wt %  | at %  |
|----------|-------|-------|
| C        | 90.10 | 92.30 |
| N        | 5.40  | 04.80 |
| O        | 3.50  | 02.70 |
| Fe       | 0.90  | 0.20  |

**Table S3** Iron contents of the various catalysts determined by ICP-OES

| Sample                | Concentration<br>(mg/L) | Mass of Fe (mg) | Total mass (mg) | wt%   |
|-----------------------|-------------------------|-----------------|-----------------|-------|
| NCA <sub>LR</sub>     | 0.00                    | 0               | 2.8             | 0.000 |
| CA <sub>LR</sub> /Fe  | 0.018                   | 0.0018          | 3.2             | 0.056 |
| NCA <sub>LR</sub> /Fe | 0.32                    | 0.032           | 2.4             | 1.33  |

**Table S4** BET surface area and pore distribution of the CA<sub>LR</sub>, NCA<sub>LR</sub>, CA<sub>LR</sub>/Fe and NCA<sub>LR</sub>/Fe catalysts.

| Sample                | S <sub>BET</sub><br>(m <sup>2</sup> g <sup>-1</sup> ) | Pore volumes<br>(cm <sup>3</sup> g <sup>-1</sup> ) | Pore volume percentage (%) |          |           |
|-----------------------|-------------------------------------------------------|----------------------------------------------------|----------------------------|----------|-----------|
|                       |                                                       |                                                    | micropore                  | mesopore | macropore |
| CA <sub>LR</sub>      | 857.3                                                 | 1.306                                              | 19.8                       | 77.1     | 3.1       |
| NCA <sub>LR</sub>     | 719.3                                                 | 0.75                                               | 36.1                       | 60.5     | 3.3       |
| CA <sub>LR</sub> /Fe  | 777.2                                                 | 1.12                                               | 23.4                       | 71.1     | 5.5       |
| NCA <sub>LR</sub> /Fe | 699.8                                                 | 0.91                                               | 24.2                       | 71.0     | 4.8       |

**Table S5** EXAFS fitting results of NCA<sub>LR</sub>/Fe by using FePc as a reference.

| Sample                | N | R       | σ <sup>2</sup> |
|-----------------------|---|---------|----------------|
| NCA <sub>LR</sub> /Fe | 4 | 1.96960 | 0.00724        |
| FePc                  | 4 | 1.97578 | 0.01088        |

**Table S6** Comparison of the ORR performance of the NCA<sub>ST</sub>/Fe catalyst with results of relevant TM–N/C catalysts in recent literatures

| Materials                               | Half-wave potential (V) | Ref.      |
|-----------------------------------------|-------------------------|-----------|
| NiCo alloy/carbon nanofibers            | 0.80                    | [1]       |
| Co nanoparticles/3D Carbon              | 0.83                    | [2]       |
| Carbon nanosphere/single-atom catalysts | 0.84                    | [3]       |
| Bimetal/nitrogen co-doped carbon        | 0.85                    | [4]       |
| Copper single atom catalyst             | 0.87                    | [5]       |
| Single cobalt atoms catalyst            | 0.88                    | [6]       |
| Single-atom Fe-N <sub>4</sub> catalyst  | 0.88                    | [7]       |
| Biomass hydrogel derived single Fe atom | 0.88                    | This work |
| Single Fe atoms/N-doped carbon          | 0.90                    | [8]       |

**Table S7** Electron transfer numbers (n) for different catalysts.

| Potential | NCA <sub>LR</sub> /Fe | CA <sub>LR</sub> /Fe | NCA <sub>LR</sub> | CA <sub>LR</sub> |
|-----------|-----------------------|----------------------|-------------------|------------------|
| 0.8       | 3.85                  | 2.83                 | 3.27              | 2.84             |
| 0.7       | 3.83                  | 2.56                 | 3.62              | 2.91             |
| 0.6       | 3.85                  | 2.31                 | 3.26              | 2.41             |
| 0.5       | 3.87                  | 2.47                 | 3.31              | 2.51             |
| 0.4       | 3.92                  | 2.82                 | 3.45              | 2.75             |
| 0.3       | 3.96                  | 3.26                 | 3.57              | 3.08             |
| 0.2       | 4.00                  | 3.55                 | 3.73              | 3.39             |
| Average n | 3.90                  | 2.83                 | 3.46              | 2.84             |

**Table S8** Electron transfer numbers (n) for the NCA<sub>LR</sub>/Fe catalyst in the acidic medium.

| Potential (V) | 0.7  | 0.6 | 0.5  | 0.4  | 0.3  | 0.2  | Average N |
|---------------|------|-----|------|------|------|------|-----------|
| n             | 3.88 | 3.6 | 3.75 | 3.84 | 3.87 | 3.97 | 3.82      |

**Table S9** Al-air battery performance of this work and other literatures.

| Catalysts                                          | Maximal power density/ mW cm <sup>-2</sup> | Open circuit voltage/ V | Voltage at 20 mA cm <sup>-2</sup> /V |
|----------------------------------------------------|--------------------------------------------|-------------------------|--------------------------------------|
| <b>This work</b>                                   | <b>181.1</b>                               | <b>1.81</b>             | <b>1.70</b>                          |
| Commercial Pt/C                                    | 175.0                                      | 1.79                    | 1.64                                 |
| Co-doped carbon <sup>[9]</sup>                     | 161.1                                      | 1.70                    |                                      |
| Fe/N co-doped carbon <sup>[10]</sup>               |                                            |                         | 1.68                                 |
| Cu/Fe-N-C <sup>[11]</sup>                          |                                            |                         | 1.64                                 |
| Fe <sub>3</sub> C@Fe/N-G-1 <sup>[12]</sup>         | 129.9                                      |                         | 1.56                                 |
| Fe-Co/N-doped C <sup>[13]</sup>                    |                                            |                         | 1.46                                 |
| Defect-engineered MnO <sub>2</sub> <sup>[14]</sup> | 159                                        | 1.90                    |                                      |

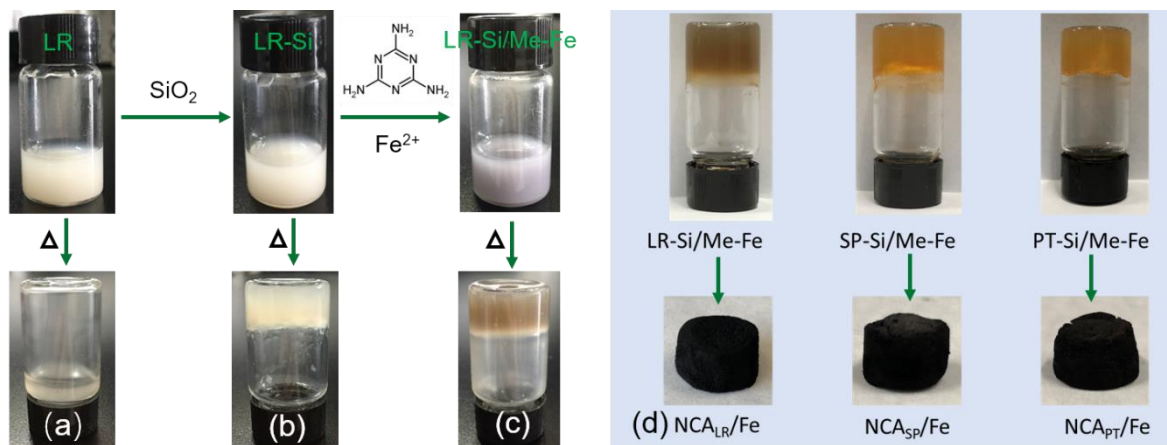

**Fig. S1** Digital photographs of LR sol and hydrogels: (a) LR sol, (b) LR-Si hydrogel, and (c) LR-Si/Me-Fe hydrogels. (d) Biomass hydrogels that are used to synthesize carbon aerogels embedded with single Fe atom catalysts.

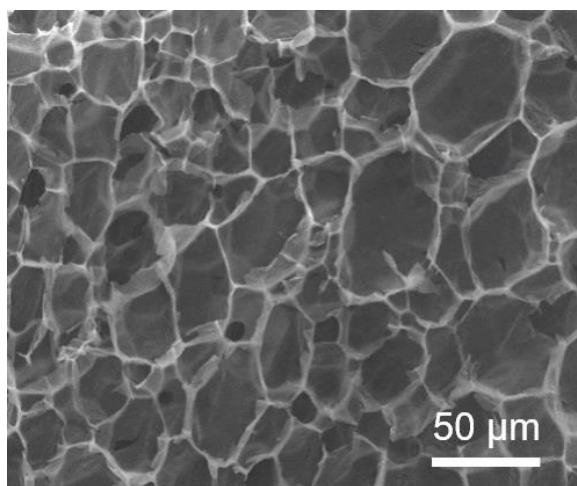

**Fig. S2** SEM image of LR hydrogel.

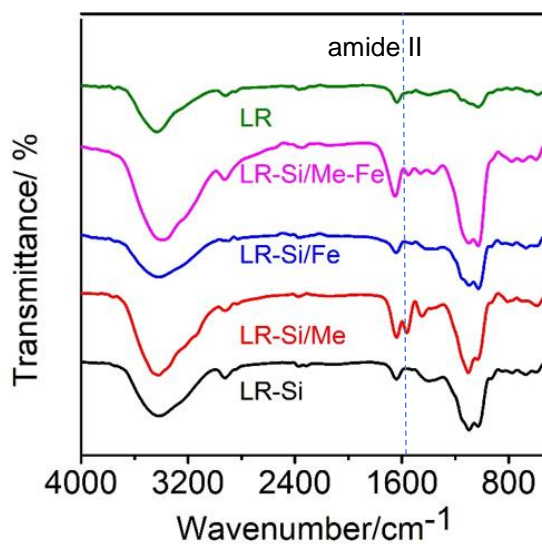

**Fig. S3** FTIR spectra of LR-Si, LR-Si/Me, LR-Si/Fe, LR-Si/Me-Fe and LR hydrogels.

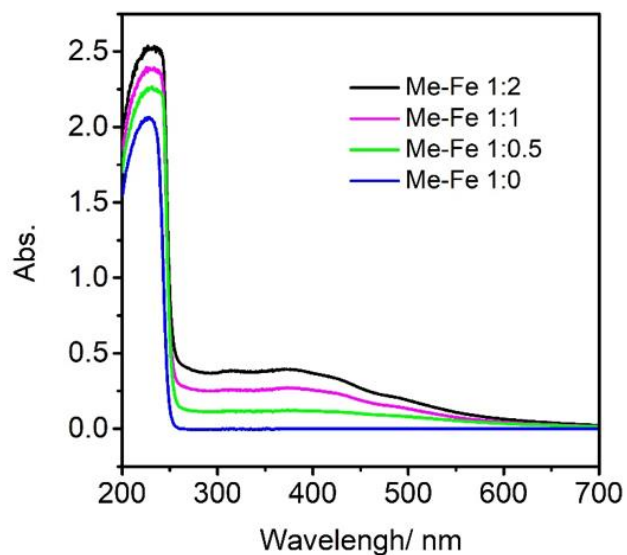

**Fig. S4** UV-vis spectra of the Me-Fe complex at different melamine:Fe ratios. At increasing Fe loading, the major absorption peak of the melamine-Fe sol (215 nm) becomes intensified and red-shifts significantly. In addition, two new peaks appear at 305 nm and 380 nm and grow gradually.

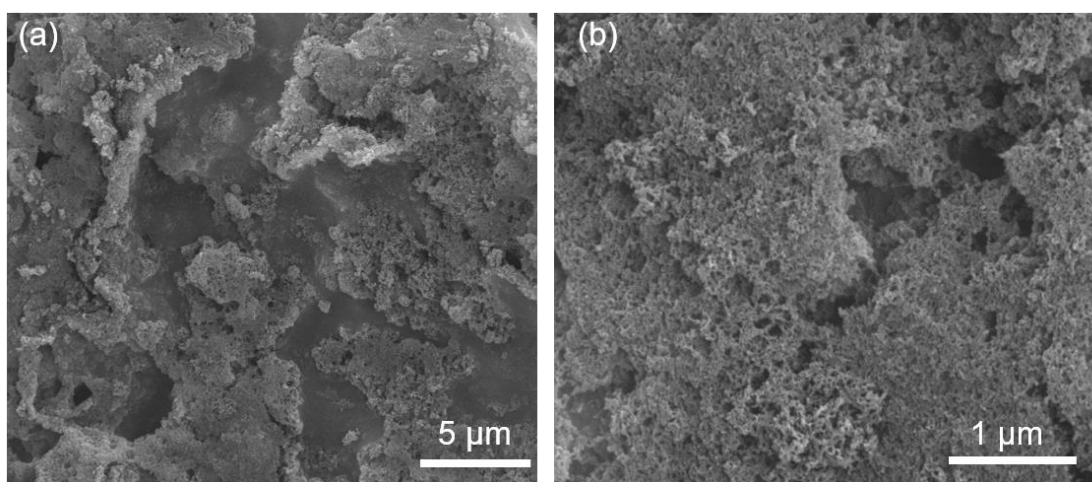

**Fig. S5** SEM images of NCA<sub>LR</sub>/Fe.

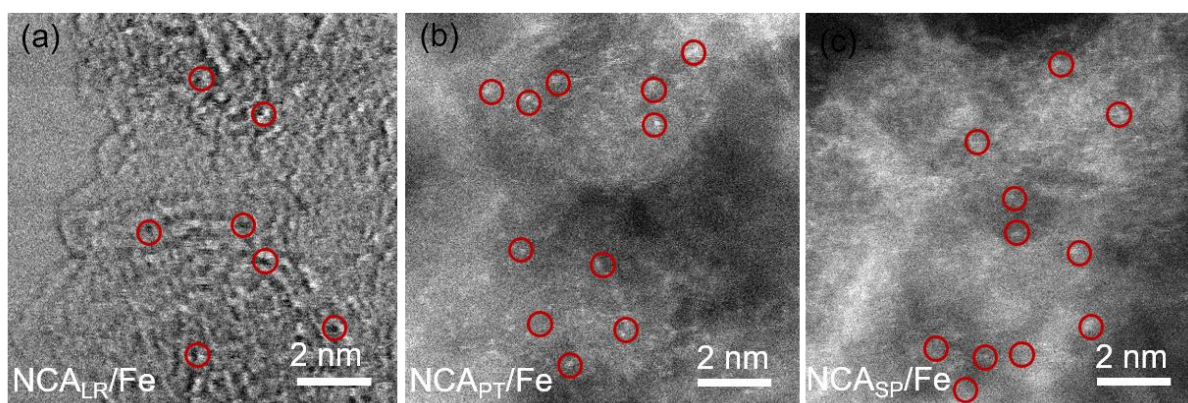

**Fig. S6** STEM images of NCA<sub>LR</sub>/Fe (HAABF), NCA<sub>PT</sub>/Fe (HAADF) and NCA<sub>SP</sub>/Fe (HAADF).

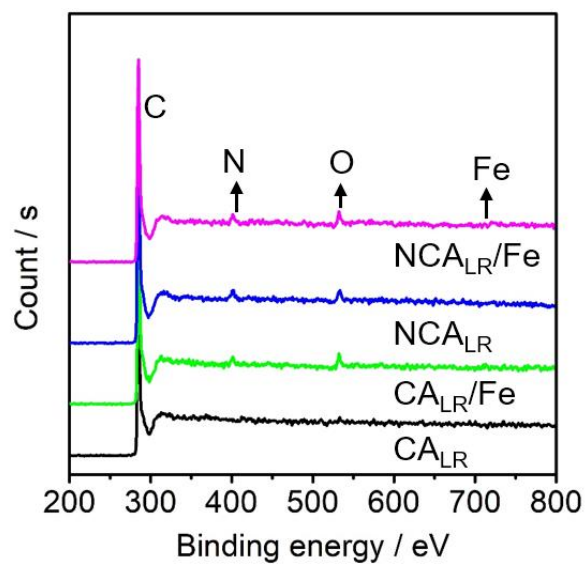

**Fig. S7** XPS survey spectra of the CA<sub>LR</sub>, NCA<sub>LR</sub>, CA<sub>LR</sub>/Fe and NCA<sub>LR</sub>/Fe catalysts.

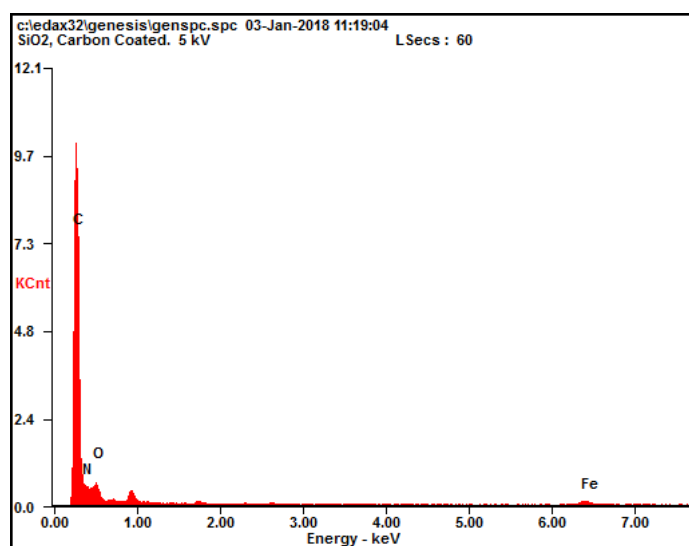

**Fig. S8** EDS analysis of the NCA<sub>LR</sub>/Fe catalyst.

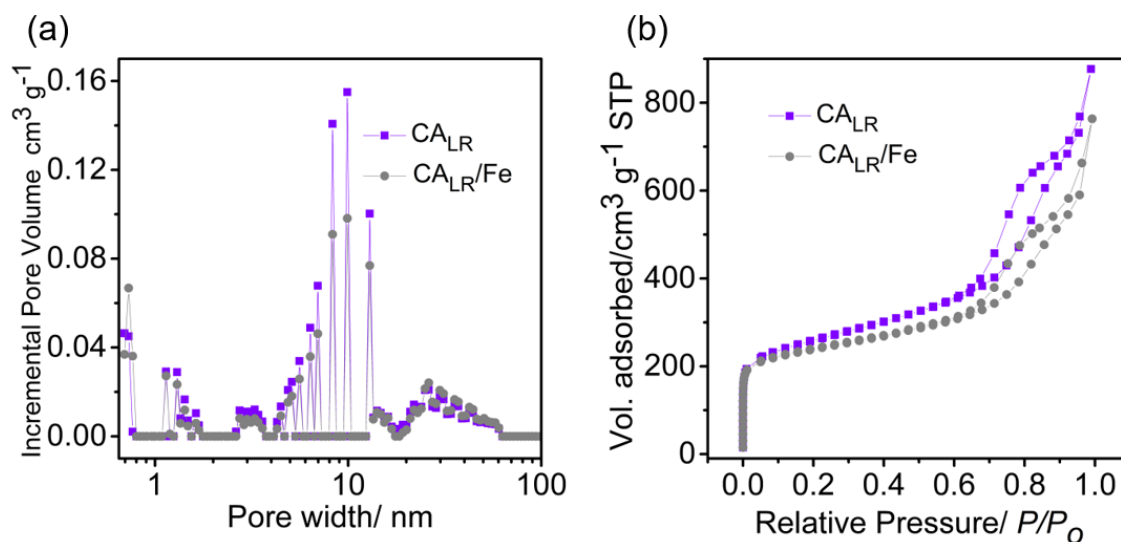

**Fig. S9** (a and b)  $\text{N}_2$  adsorption-desorption isotherms and (c and d) pore size distribution of the  $\text{CA}_{\text{LR}}$ ,  $\text{NCA}_{\text{LR}}$ ,  $\text{CA}_{\text{LR}}/\text{Fe}$  and  $\text{NCA}_{\text{LR}}/\text{Fe}$  catalysts.

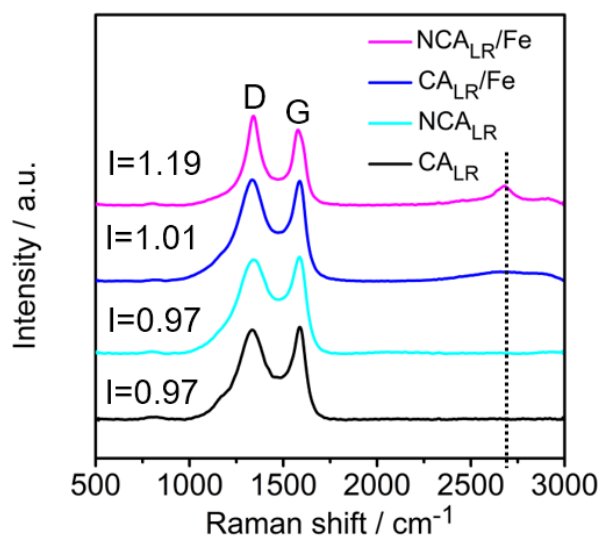

**Fig. S10** Raman spectra of the catalysts:  $\text{CA}_{\text{LR}}$ ,  $\text{NCA}_{\text{LR}}$ ,  $\text{CA}_{\text{LR}}/\text{Fe}$  and  $\text{NCA}_{\text{LR}}/\text{Fe}$ .

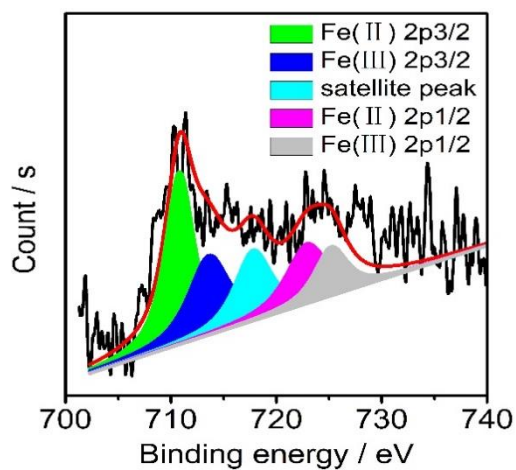

**Fig. S11** High-resolution XPS scan of the Fe 2P electrons of NCA<sub>LR</sub>/Fe.

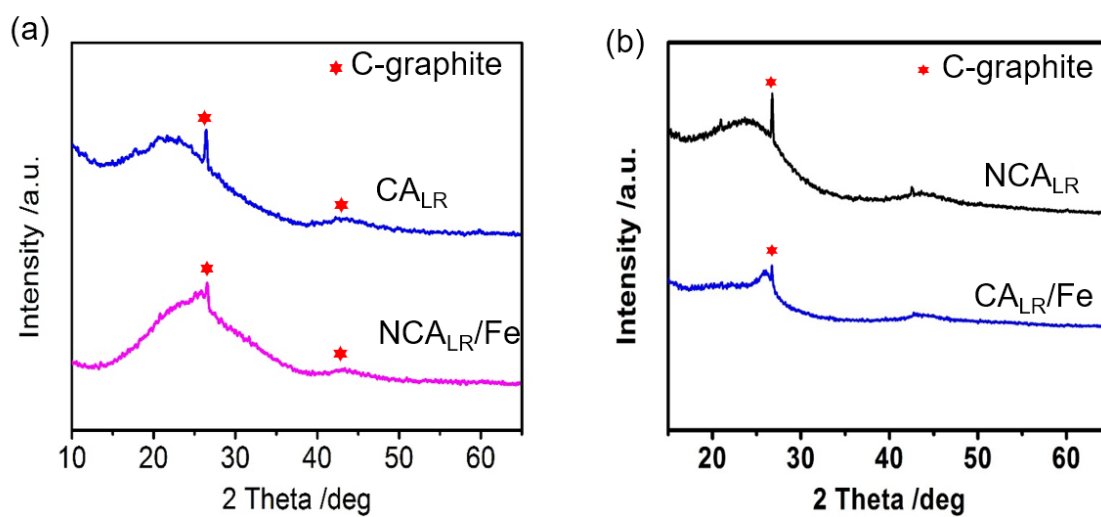

**Fig. S12** XRD patterns of the CA<sub>LR</sub>, NCA<sub>LR</sub>, CA<sub>LR</sub>/Fe and NCA<sub>LR</sub>/Fe catalysts.



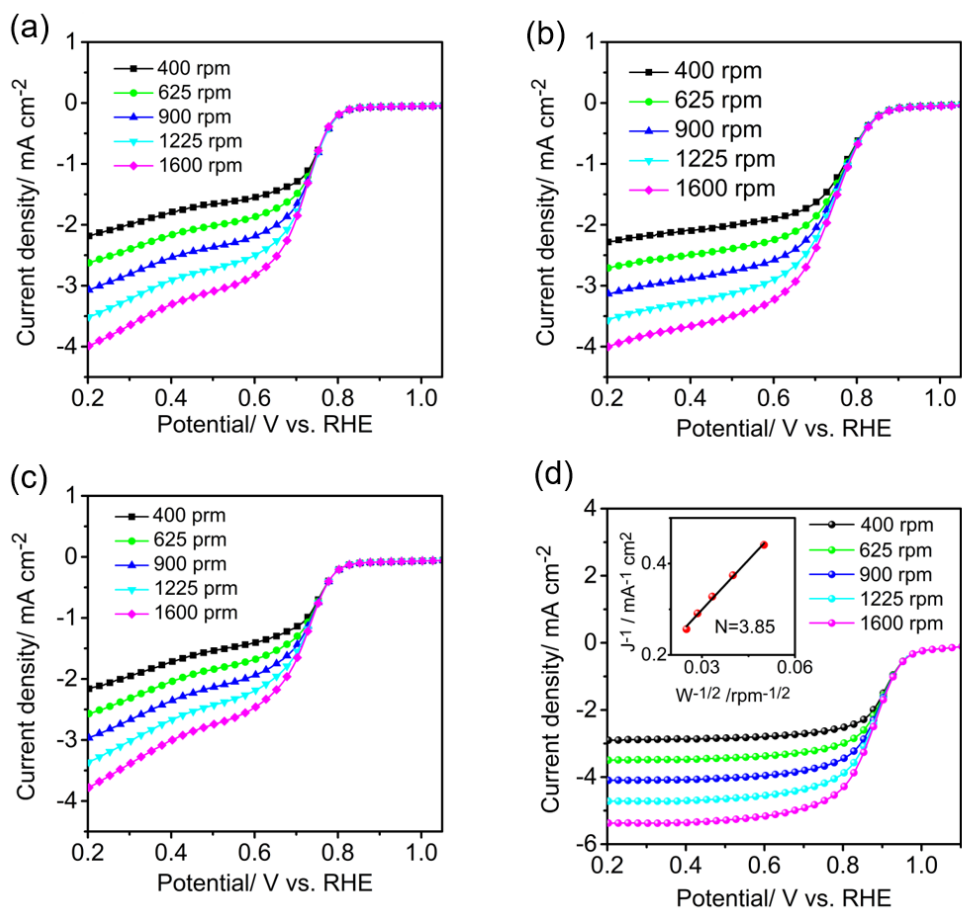

**Fig. S13** LSV curves for (a) CA<sub>LR</sub>, (b) NCA<sub>LR</sub>, (c) CA<sub>LR</sub>/Fe and (d) NCA<sub>LR</sub>/Fe at different rotation rates in 0.1 M KOH, inset to panel (d) is the Koutecky-Levich plot at +0.85 V.

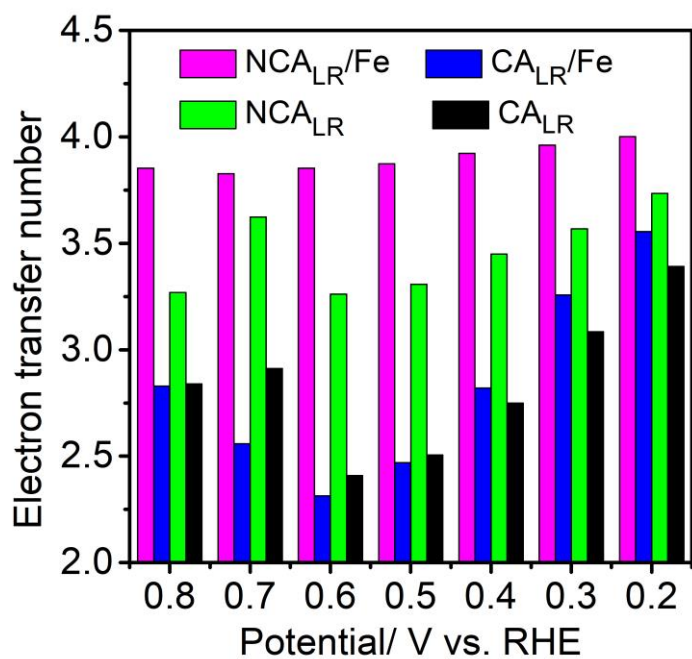

**Fig. S14** Electron transfer numbers of various catalysts at different potentials.

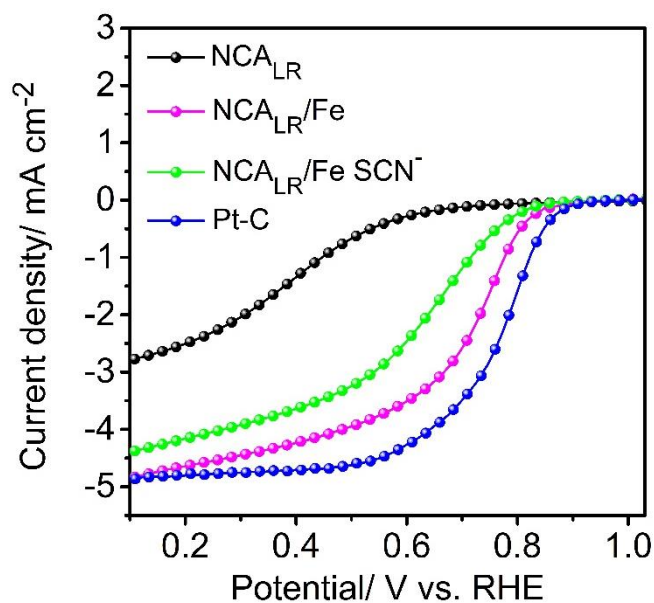

**Fig. S15** LSVs of  $\text{NCA}_{\text{LR}}$ ,  $\text{NCA}_{\text{LR}}/\text{Fe}$  (without or with 10 mM  $\text{SCN}^-$ ) and Pt/C as ORR catalysts at 1600 rpm; scan rate:  $5 \text{ mV s}^{-1}$ , medium:  $\text{O}_2$ -saturated 0.1 M  $\text{HClO}_4$ .

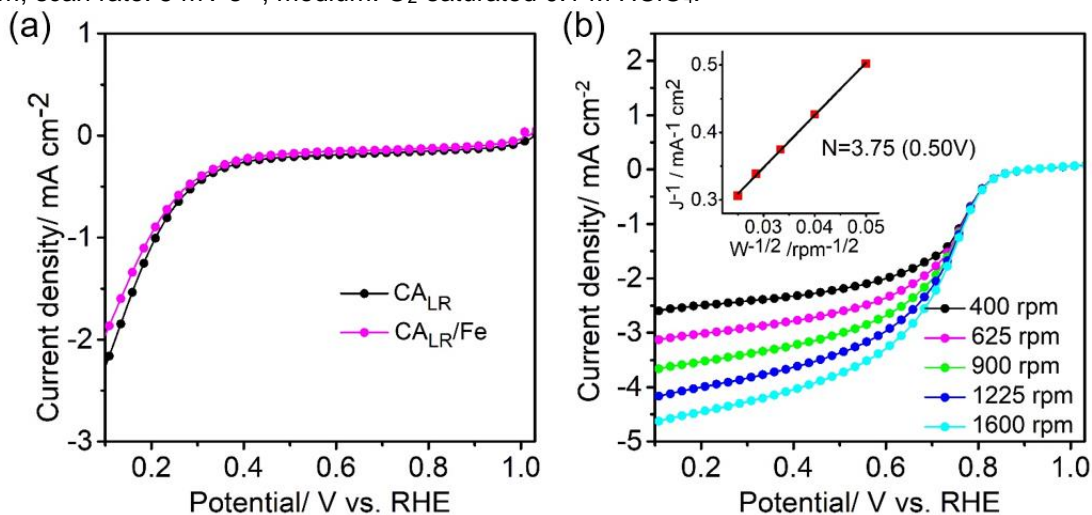

**Fig. S16** (a) LSVs of the  $\text{CA}_{\text{LR}}$  and  $\text{CA}_{\text{LR}}/\text{Fe}$  in  $\text{O}_2$ -saturated 0.1 M  $\text{HClO}_4$ . (b) LSVs of the  $\text{NCA}_{\text{LR}}/\text{Fe}$  at different rotation rates. Inset to panel (b) is the Koutecky-Levich plot at 0.50 V. Scan rate  $5 \text{ mV s}^{-1}$ .

The ORR activity in acidic medium (0.1 M  $\text{HClO}_4$ ) was also investigated. As shown in Fig. S9 and S10, the  $\text{NCA}_{\text{LR}}/\text{Fe}$  sample exhibits a half-wave potential of +0.72 V, which is very close to that of Pt/C (+0.77 V). Table S3 lists the average  $n$  value (3.82) of the  $\text{NCA}_{\text{LR}}/\text{Fe}$  within the potential range of +0.2 V to +0.7 V, again, suggesting a  $4e^-$  reaction pathway from  $\text{O}_2$  to  $\text{H}_2\text{O}$ . To explore the function of single metal atom sites in the  $\text{NCA}_{\text{LR}}/\text{Fe}$  catalyst,  $\text{SCN}^-$  was added during the tests as they could strongly coordinate with the metal sites. As shown in Fig. S9 and S11, upon the addition of  $\text{SCN}^-$  into the acidic medium, the  $E_{1/2}$  of the  $\text{NCA}_{\text{LR}}/\text{Fe}$  catalyst shifts negatively by ca. 90 mV, suggesting that the ORR activity is dominated by the Fe atom sites.

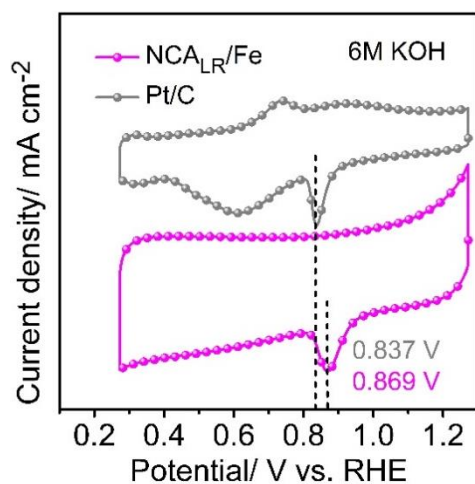

**Fig. S17** CV of  $\text{NCA}_{\text{LR}}/\text{Fe}$  and Pt/C as ORR catalysts in 6 M KOH.

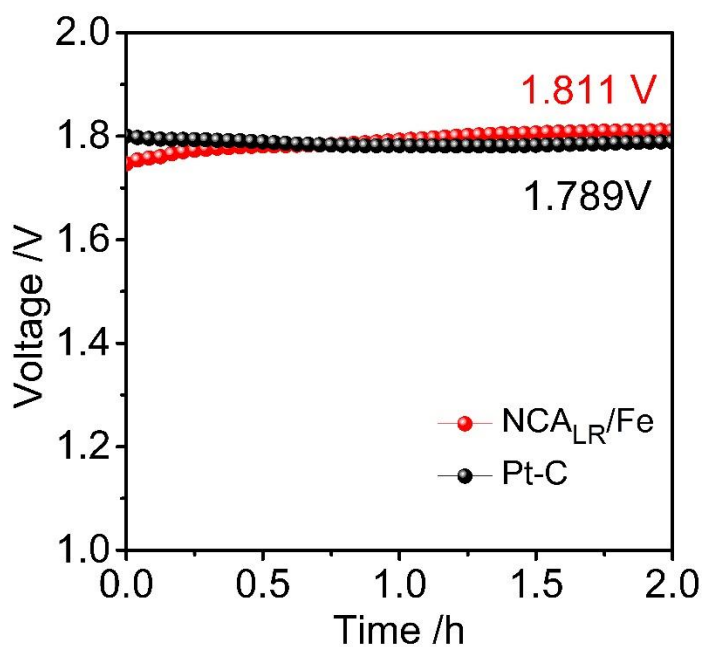

**Fig. S18** Open circuit voltage tests of  $\text{NCA}_{\text{LR}}/\text{Fe}$  and Pt/C.

## Supplementary References

- [1] Y. Fu, H.-Y. Yu, C. Jiang, T.-H. Zhang, R. Zhan, X. Li, J.-F. Li, J.-H. Tian, R. Yang, *Adv. Funct. Mater.* **2018**, 28, 1705094.
- [2] H. Jiang, Y. Liu, W. Z. Li, J. Li, *Small* **2018**, 14.
- [3] A. Han, W. Chen, S. Zhang, M. Zhang, Y. Han, J. Zhang, S. Ji, L. Zheng, Y. Wang, L. Gu, C. Chen, Q. Peng, D. Wang, Y. Li, *Adv. Mater.* **2018**, 30, e1706508.
- [4] M. L. Tan, T. He, J. Liu, H. Q. Wu, Q. Li, J. Zheng, Y. Wang, Z. F. Sun, S. Y. Wang, Y. Zhang, *Journal of Materials Chemistry A* **2018**, 6, 8227.
- [5] F. Li, G.-F. Han, H.-J. Noh, S.-J. Kim, Y. Lu, H. Y. Jeong, Z. Fu, J.-B. Baek, *Energy Environ. Sci.* **2018**.
- [6] P. Yin, T. Yao, Y. Wu, L. Zheng, Y. Lin, W. Liu, H. Ju, J. Zhu, X. Hong, Z. Deng, G. Zhou, S. Wei, Y. Li, *Angew. Chem. Int. Ed.* **2016**, 55, 10800.
- [7] Y. Pan, S. Liu, K. Sun, X. Chen, B. Wang, K. Wu, X. Cao, W. C. Cheong, R. Shen, A. Han, Z. Chen, L. Zheng, J. Luo, Y. Lin, Y. Liu, D. Wang, Q. Peng, Q. Zhang, C. Chen, Y. Li, *Angew. Chem. Int. Ed.* **2018**, 57, 8614.
- [8] Y. Chen, S. Ji, Y. Wang, J. Dong, W. Chen, Z. Li, R. Shen, L. Zheng, Z. Zhuang, D. Wang, Y. Li, *Angew. Chem. Int. Ed.* **2017**, 56, 6937.
- [9] J. Li, Z. Zhou, K. Liu, F. Li, Z. Peng, Y. Tang, H. Wang, *J. Power Sources* **2017**, 343, 30.
- [10] J. Li, J. Chen, H. Wang, Y. Ren, K. Liu, Y. Tang, M. Shao, *Energy Storage Materials* **2017**, 8, 49.
- [11] J. Li, J. Chen, H. Wan, J. Xiao, Y. Tang, M. Liu, H. Wang, *Applied Catalysis B: Environmental* **2019**, 242, 209.
- [12] K. Liu, Z. G. Peng, H. Y. Wang, Y. R. Ren, D. P. Liu, J. S. Li, Y. G. Tang, N. Zhang, *Journal of the Electrochemical Society* **2017**, 164, F475.
- [13] M. Tan, T. He, J. Liu, H. Wu, Q. Li, J. Zheng, Y. Wang, Z. Sun, S. Wang, Y. Zhang, *Journal of Materials Chemistry A* **2018**, 6, 8227.
- [14] M. Jiang, C. Fu, J. Yang, Q. Liu, J. Zhang, B. Sun, *Energy Storage Materials* **2019**, 18, 34.
